# Supplementary material for: Extraction desulfurization process of fuels with ammonium-based deep eutectic solvents
Source: Royal Society of Chemistry journal article supplement (doi:10.1039/c3gc41067f), 2013-01-01
Supplement: c3gc41067f.pdf [file c3gc41067f.pdf]

## Supporting information Figure Captions:

- S.Fig.1**  $^1\text{H}$  NMR spectrum of ChCl/Pr(1:2)
- S.Fig.2**  $^1\text{H}$  NMR spectrum of TBAC/Pr(1:2)
- S.Fig.3**  $^1\text{H}$  NMR spectrum of TBAC/PEG(1:2)
- S.Fig.4**  $^1\text{H}$  NMR spectrum of ChCl/EG(1:2)
- S.Fig.5**  $^1\text{H}$  NMR spectrum of TMAC/PAA(1:2)
- S.Fig.6**  $^1\text{H}$  NMR spectrum of TBAC/TEG(1:2)
- S.Fig.7**  $^1\text{H}$  NMR spectrum of TBAC/EG(1:2)
- S.Fig.8**  $^1\text{H}$  NMR spectrum of TBAC/PAA(1:2)
- S.Fig.9**  $^1\text{H}$  NMR spectrum of TBAC/Caproic acid (1:2)
- S.Fig.10**  $^1\text{H}$  NMR spectrum of TBAC/Acetic acid (1:2)
- S.Fig.11** Analysis of standard curve
- S.Fig.12** The  $^1\text{H}$  NMR of different molar ratio (ChCl+Pr/BT)  
(a) 1:0 (b) 1: 0.1 (c) 1: 0.5 (d) 1: 1 (e) 0:1

S.Fig.1

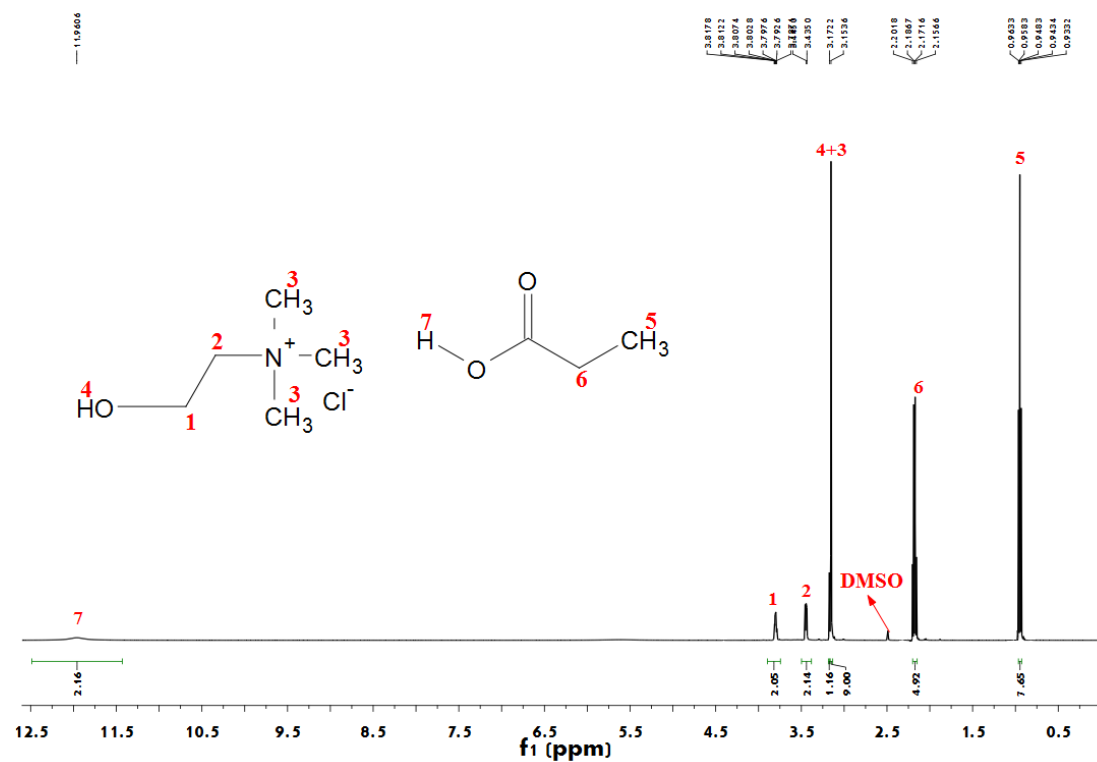

Fig.1 <sup>1</sup>H NMR spectrum of ChCl/Pr(1:2) (DMSO-d<sub>6</sub>)

S.Fig.2

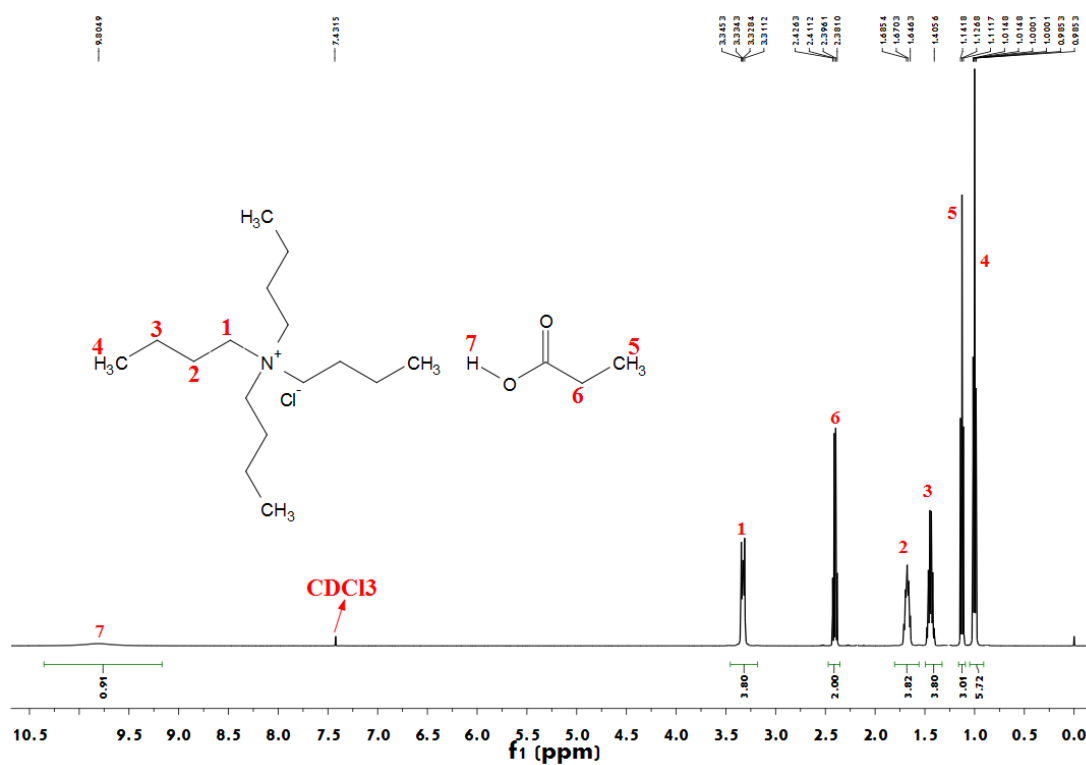

Fig.2  $^1H$  NMR spectrum of TBAC/Pr(1:2) ( $CDCl_3$ )

S.Fig.3

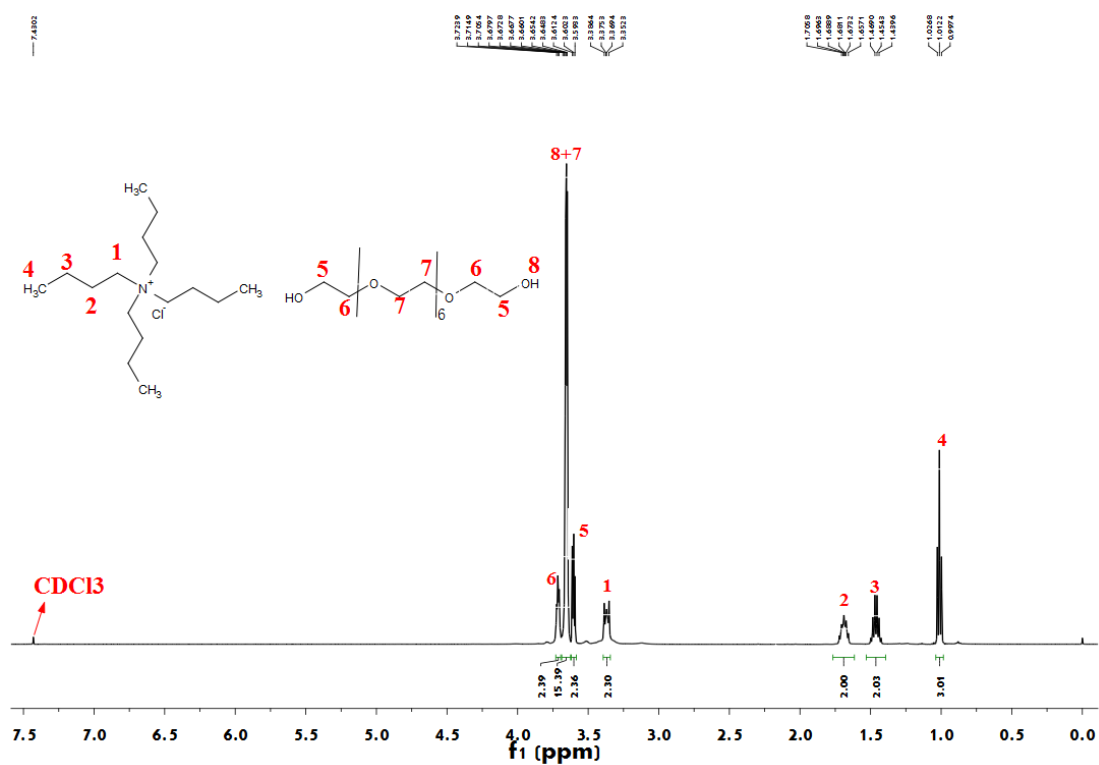

Fig.3  $^1\text{H}$  NMR spectrum of TBAC/PEG(1:2) ( $\text{CDCl}_3$ )

S.Fig.4

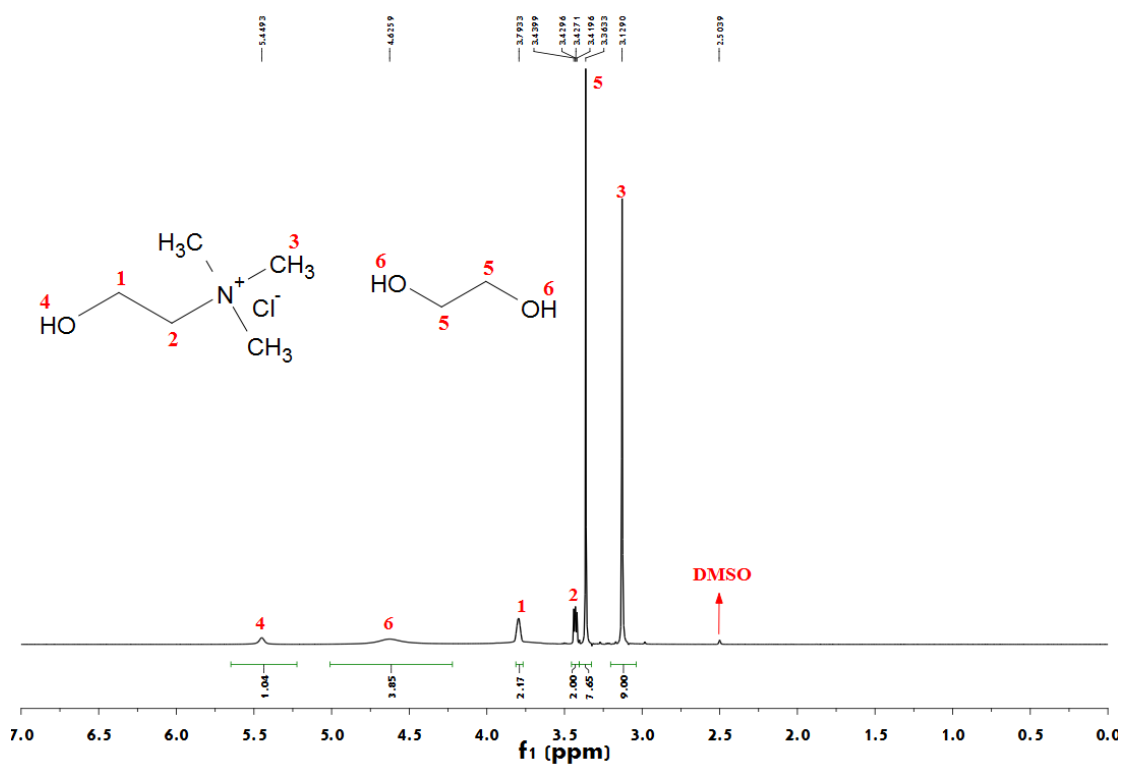

Fig.4  $^1\text{H}$  NMR spectrum of ChCl/EG(1:2) ( $\text{DMSO-d}_6$ )

S.Fig.5

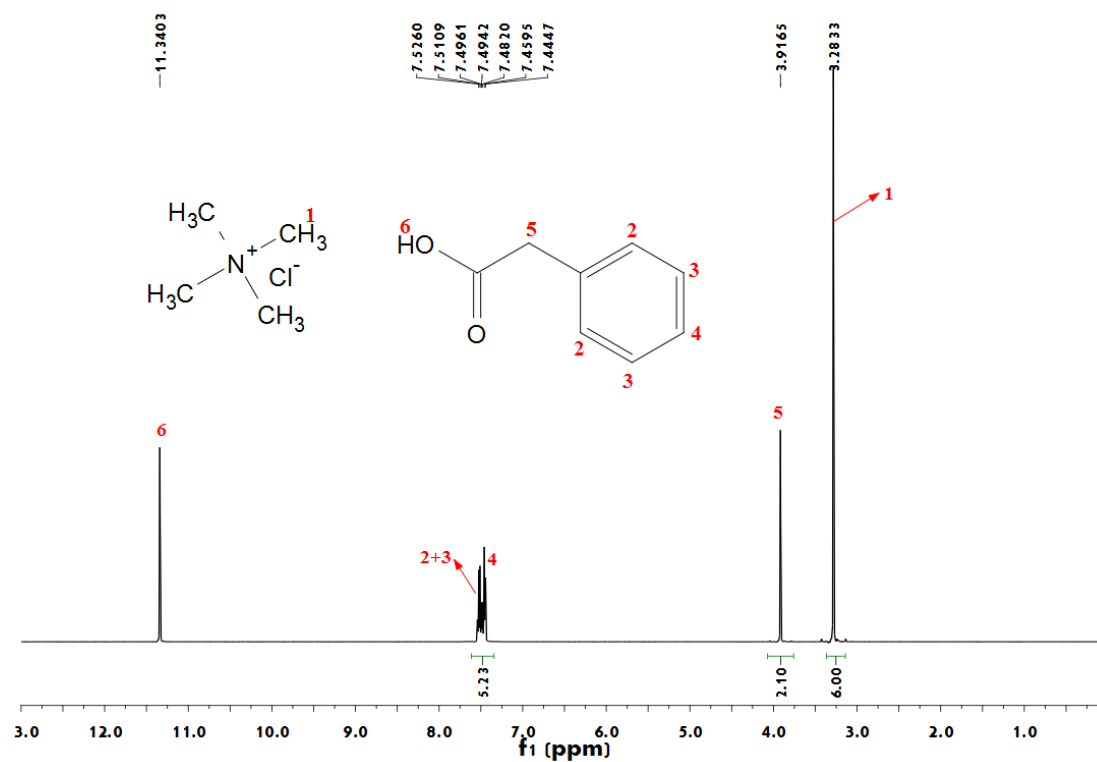

Fig.5 <sup>1</sup>H NMR spectrum of TMAC/PAA(1:2) (TFA)

S.Fig.6

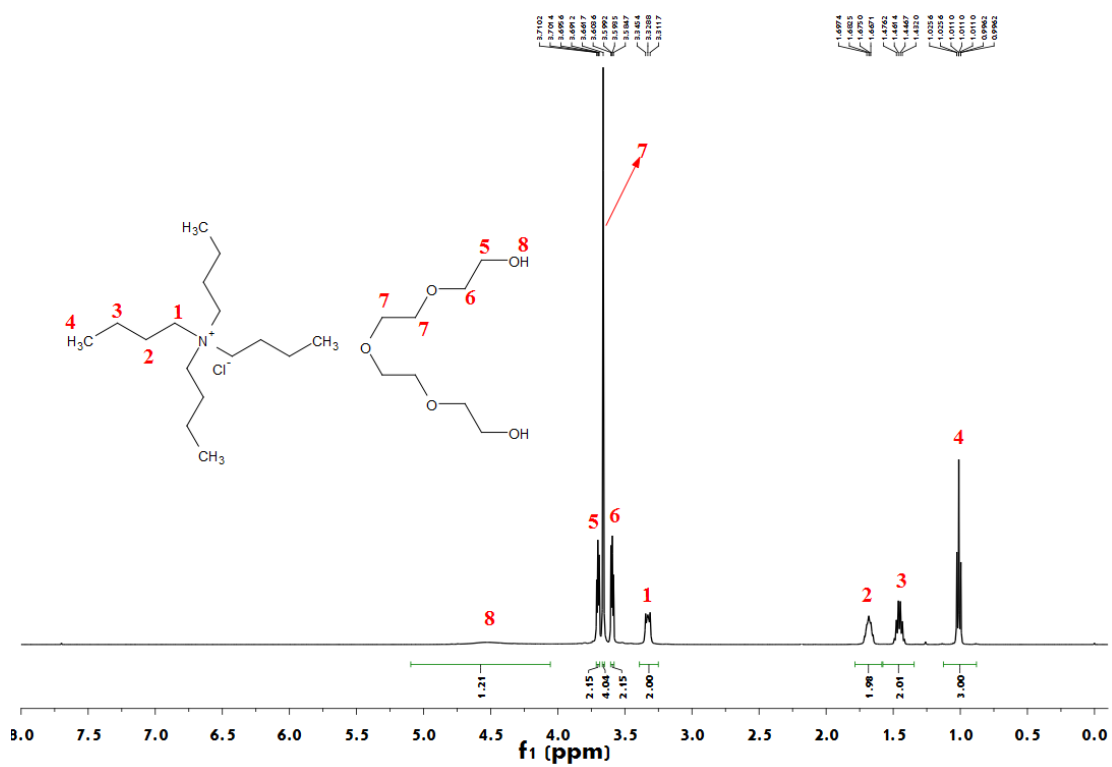

Fig.6  $^1\text{H}$  NMR spectrum of TBAC/TEG(1:2) ( $\text{CDCl}_3$ )

S.Fig.7

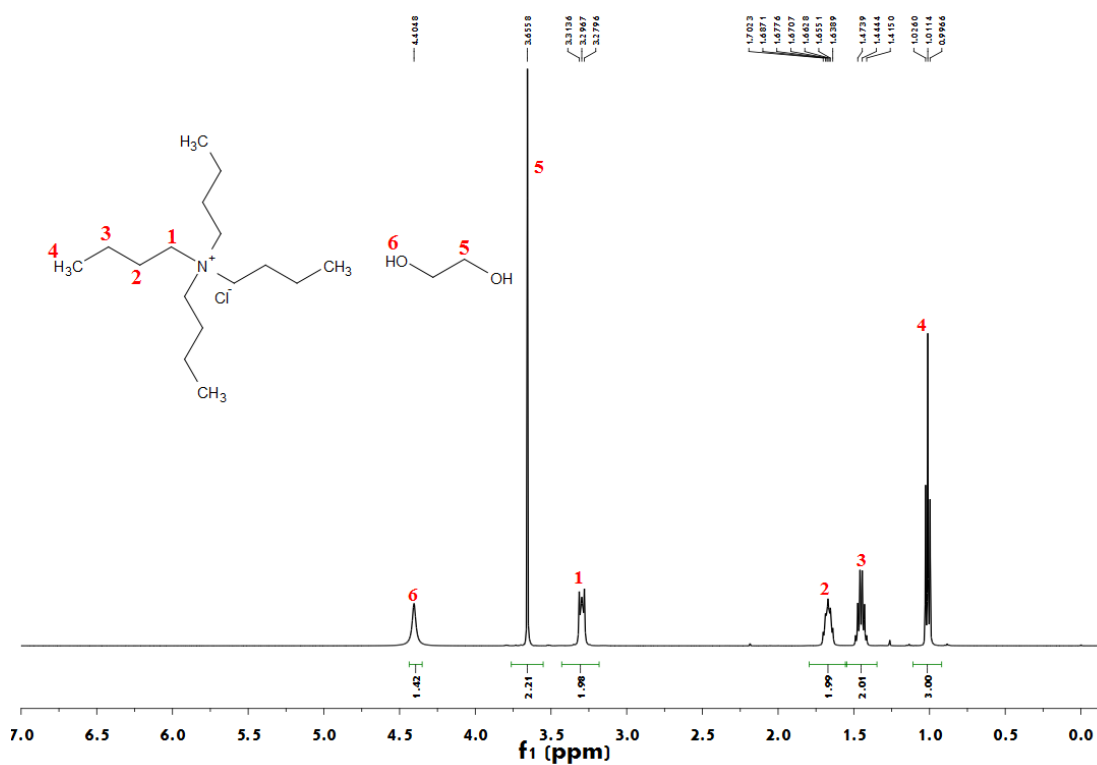

Fig.7  $^1\text{H}$  NMR spectrum of TBAC/EG(1:2) ( $\text{CDCl}_3$ )



S.Fig.8

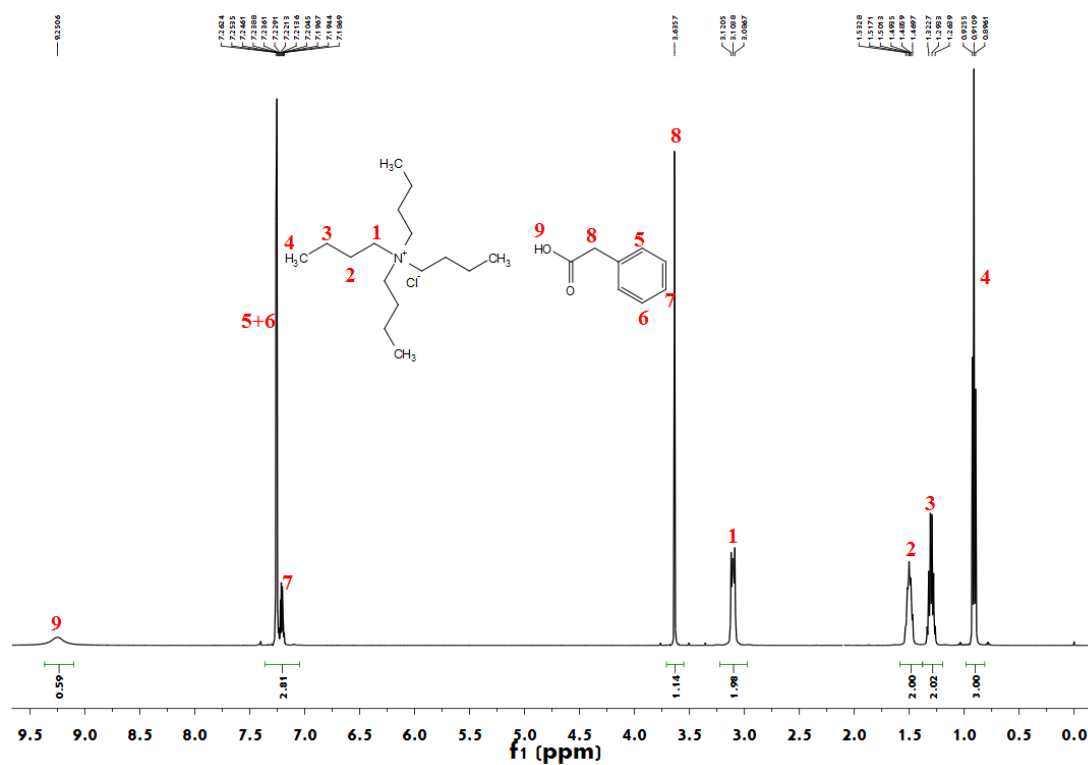

Fig.8 <sup>1</sup>H NMR spectrum of TBAC/PAA(1:2) (CDCl<sub>3</sub>)

S.Fig.9

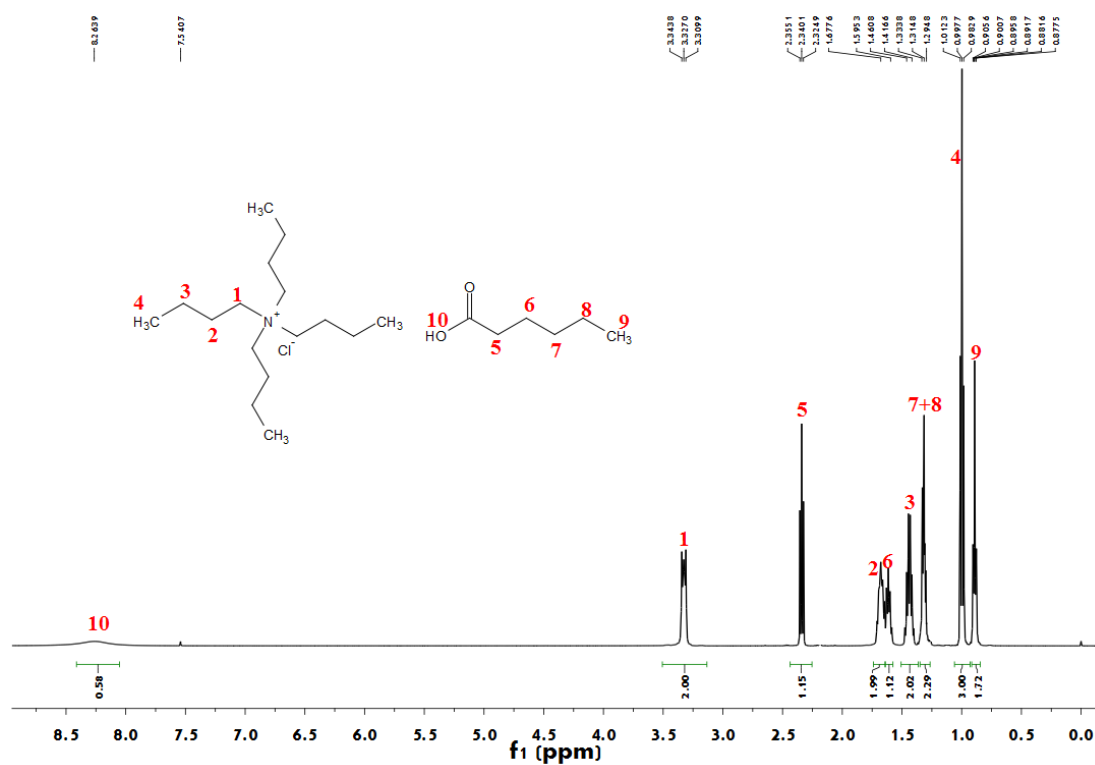

Fig.9 <sup>1</sup>H NMR spectrum of TBAC/Caproic acid (1:2) (CDCl<sub>3</sub>)

S.Fig.10

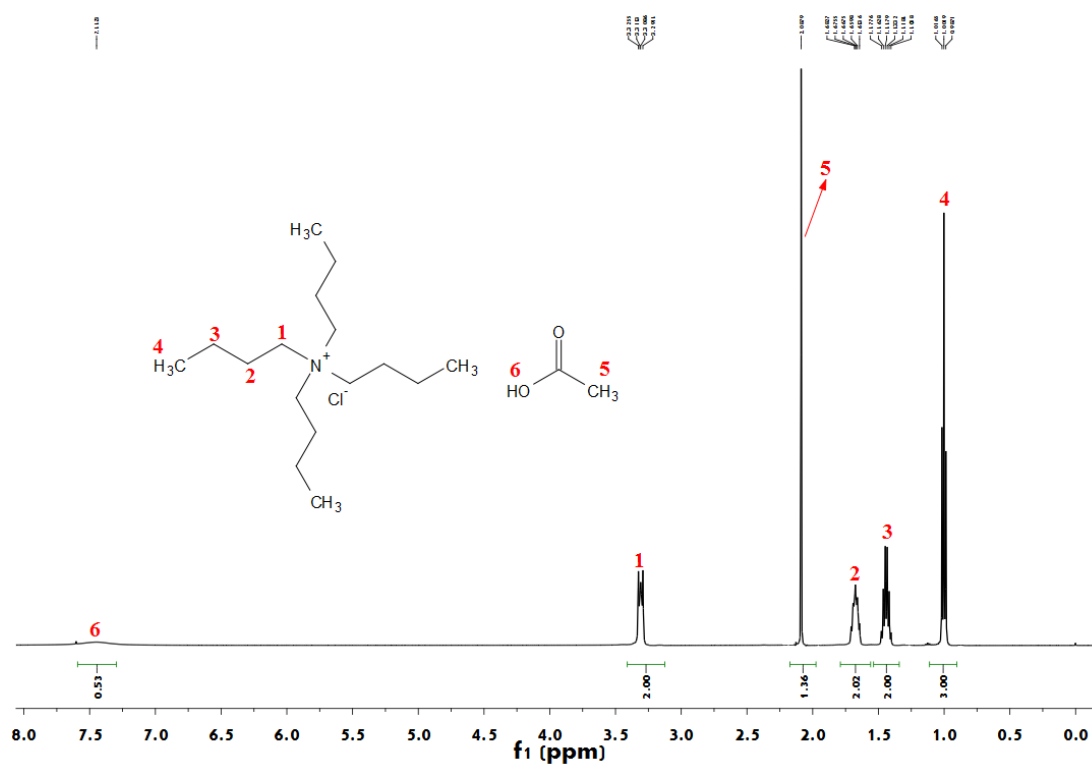

Fig.10  $^1\text{H}$  NMR spectrum of TBAC/Acetic acid (1:2) ( $\text{CDCl}_3$ )

S.Fig.11

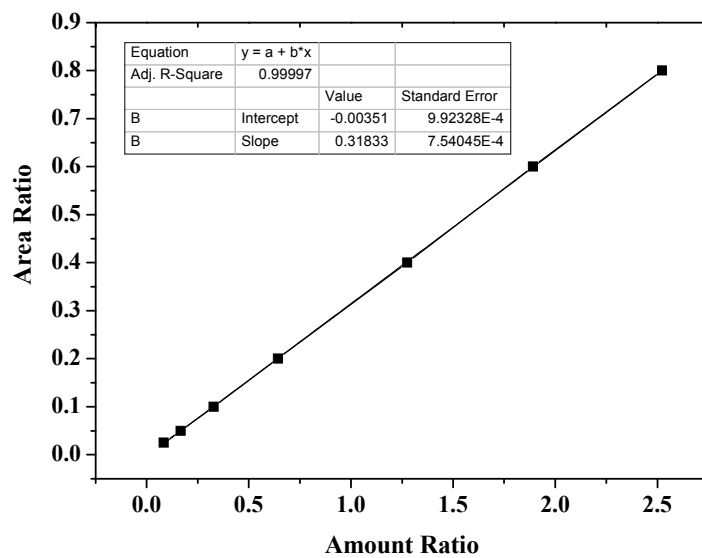

Fig.11 Analysis of standard curve

S.Fig.12

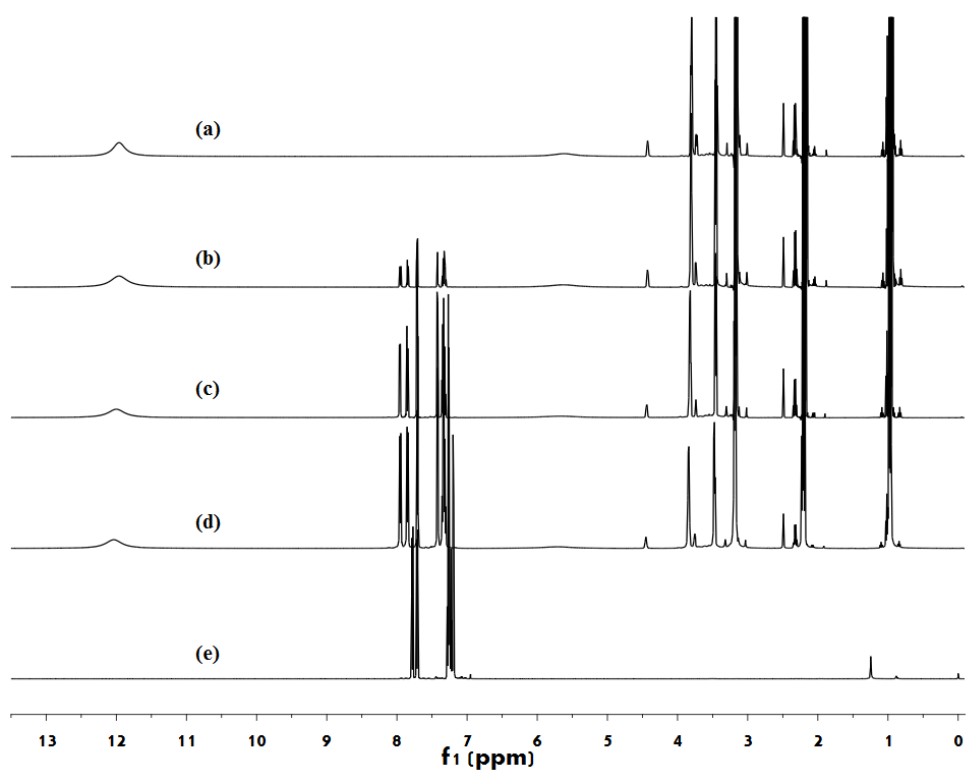

Fig.12 The <sup>1</sup>H NMR of different molar ratio (ChCl+Pr/BT)  
(a) 1:0 (b) 1: 0.1 (c) 1: 0.5 (d) 1: 1 (e) 0:1
